# Supplementary material
Source: MDPI journal article supplement (https://www.mdpi.com/2076-3417/11/18/8681)
Supplement: s1 [file s1]

**Table S1.** Calculation methods of the deformation of RSRW under static loading.

[illegible]

|                 |                                                                                                                                                                                                                                                                                                                                                                                                                   |                                                                                                                                                                                                                                                                                                                                                                                                                                                                                                                                |                                                                                                                                                                                   |
|-----------------|-------------------------------------------------------------------------------------------------------------------------------------------------------------------------------------------------------------------------------------------------------------------------------------------------------------------------------------------------------------------------------------------------------------------|--------------------------------------------------------------------------------------------------------------------------------------------------------------------------------------------------------------------------------------------------------------------------------------------------------------------------------------------------------------------------------------------------------------------------------------------------------------------------------------------------------------------------------|-----------------------------------------------------------------------------------------------------------------------------------------------------------------------------------|
|                 |                                                                                                                                                                                                                                                                                                                                                                                                                   | $\beta$ : friction angle between the brick and soil                                                                                                                                                                                                                                                                                                                                                                                                                                                                            |                                                                                                                                                                                   |
| Adams [12]      | $D_L = \frac{2b_{q,vol}D_v}{H}, \quad \varepsilon_L = \frac{D_L}{b_{q,vol}} = \frac{2D_v}{H} = 2\varepsilon_v$                                                                                                                                                                                                                                                                                                    | $D_L$ : horizontal deformation of reinforced earth retaining wall abutment;<br>$D_v$ : vertical settlement of foundation;<br>$\varepsilon_L$ : horizontal strain;<br>$b_{q,vol}$ : width of the load along the top of the wall (including setback);<br>$\varepsilon_v$ : vertical strain on the top of the retaining wall                                                                                                                                                                                                      | Volume strain 0; simultaneous deformation and strain of reinforcement and soil; horizontal strain less than 1%                                                                    |
|                 | $u_{act} = \omega\gamma z(H-z) = -\omega\gamma(z^2 - Hz), \quad \omega = \frac{\tan^3 \varphi}{E} \Delta H$                                                                                                                                                                                                                                                                                                       | $\varepsilon_{act}$ : strain of rebar in active area;<br>F: tension in geosynthetic;<br>E: elastic modulus of reinforcement;<br>$u_{act}$ : horizontal displacement of bar active area                                                                                                                                                                                                                                                                                                                                         | Frictional soil; potential rupture surface is wedge surface; only free zone causes displacement                                                                                   |
| IBW PAN [13]    | $u_x = u_{act} + u_{pass}, \quad \omega = \frac{\tan^3 \varphi}{E} \Delta H, \quad \beta = \sqrt{\frac{2BG}{E}}$ $u_{act} = \frac{\omega\gamma\Delta H \tan \alpha}{E} [H(L - H \tan \alpha)Z - (L - 2H \tan \alpha)Z^2 -$ $u_{pass} = \frac{\sigma_r(1 + e^{-2\beta l})}{\beta E(1 - e^{-2\beta l})} \Delta H, \quad \sigma_r = \omega[\gamma(L - h \tan \alpha)Z + \gamma Z^2 t$                                | H: the height of retaining wall;<br>L: length of geosynthetic;<br>$\Delta H$ : vertical spacing of reinforcement;<br>B: width of geosynthetic;<br>E: elastic modulus of reinforcement;<br>$\gamma$ : soil bulk density;<br>$\varphi$ : internal friction angle of soil;<br>P: loading; L: length of the rebar in the anchorage zone;<br>G: contact surface stiffness                                                                                                                                                           | Frictional soil; potential rupture surface is wedge surface; no external load                                                                                                     |
|                 | $u_x = u_{act} + u_{pass}, \quad \omega = \frac{\tan^3 \varphi}{E} \Delta H, \quad \alpha = 45^\circ - \frac{\varphi}{2}$ $u_{act} = \frac{\omega\Delta H \tan \alpha}{E} \left\{ pH(L - H \tan \alpha) + [p(2H \tan \alpha - L) + \gamma H(L - H \tan \alpha)] Z^2 - Z^3 \gamma \tan \alpha \right.$ $u_{pass} = \frac{\sigma_r(1 + e^{-2\beta l})}{\beta E(1 - e^{-2\beta l})} \Delta H$                        | $\gamma$ : soil bulk density;<br>$\varphi$ : internal friction angle of soil;<br>P: loading; L: length of the rebar in the anchorage zone;<br>G: contact surface stiffness<br>$K_e$ : average of the active earth pressure coefficient and static earth pressure coefficient;<br>$\gamma$ : soil bulk density;<br>t: geogrid thickness ratio;<br>$E_r$ : elastic modulus of geogrid;<br>$\nu_r$ : Poisson's ratio of geogrid;<br>$E_s$ : elastic modulus of the filling soil;<br>G: shear modulus of the equivalent elastomer; | Frictional soil: potential rupture surface is a wedge surface; there is an external load                                                                                          |
| Wang Liyan [11] | $s = s_b + s_s = \frac{k_e \gamma H^2}{10EL^2} \left( 9Hz^2 - \frac{7}{2}z^3 \right) + \frac{k_e \gamma}{6GL} (H^3 -$ $E = \left[ \frac{(1-t)E_s}{1-\nu_s^2} + \frac{tE_r}{1-\nu_r^2} \right] (1-\nu^2), \quad t = \sum m / H, \quad G = \frac{1}{2}$ $\nu = \left[ \frac{t\nu_r E_r}{1-\nu_r^2} + \frac{(1-t)\nu_s E_s}{1-\nu_s^2} \right] / \left[ \frac{tE_r}{1-\nu_r^2} + \frac{(1-t)E_s}{1-\nu_s^2} \right]$ | $K_e$ : average of the active earth pressure coefficient and static earth pressure coefficient;<br>$\gamma$ : soil bulk density;<br>t: geogrid thickness ratio;<br>$E_r$ : elastic modulus of geogrid;<br>$\nu_r$ : Poisson's ratio of geogrid;<br>$E_s$ : elastic modulus of the filling soil;<br>G: shear modulus of the equivalent elastomer;                                                                                                                                                                               | Deformation form of the retaining wall; the earth pressure behind the wall is a triangular distributed load; horizontal isotropic elastomer for a reinforced earth retaining wall |

|             |                                                                                                                       |  |  |  |  |  |  |  |                                                                                                                                                                                                                                                                                                                                                     |                                                                               |
|-------------|-----------------------------------------------------------------------------------------------------------------------|--|--|--|--|--|--|--|-----------------------------------------------------------------------------------------------------------------------------------------------------------------------------------------------------------------------------------------------------------------------------------------------------------------------------------------------------|-------------------------------------------------------------------------------|
|             |                                                                                                                       |  |  |  |  |  |  |  | $V_s$ : Poisson's ratio of the fill;<br>m: geogrid thickness                                                                                                                                                                                                                                                                                        |                                                                               |
|             |                                                                                                                       |  |  |  |  |  |  |  | H: Height of the retaining wall;<br>h: vertical spacing of reinforcement;<br>E: elastic modulus of reinforcement;<br>L: length of geosynthetic;<br>$C_1$ : stiffened filler cohesion;<br>$\phi_1$ : internal friction angle of reinforced filler;<br>$\phi_2$ : internal friction angle of the rear filler<br>$C_2$ : viscosity of the rear filler; |                                                                               |
| He Wei [14] | $y = 2.5416H + 18.8848h - 0.3609E - 2.3728L - 0.3026C_1 - 0.4832\phi_1 + 0.0574C_2 + 0.0847\phi_2$ (Two dimensions)   |  |  |  |  |  |  |  |                                                                                                                                                                                                                                                                                                                                                     | The relationship between the parameters and horizontal displacement is linear |
|             | $y = 2.4614H + 16.7550h - 0.2935E - 2.3242L - 0.2909C_1 - 0.4483\phi_1 + 0.0724C_2 + 0.0937\phi_2$ (Three dimensions) |  |  |  |  |  |  |  |                                                                                                                                                                                                                                                                                                                                                     |                                                                               |

**Table S2.** Reinforced soil retaining wall parameters of 10 case histories.

| Case Number | H (m) | L(m) | $\varepsilon_d(\%)$ | $T_y(\text{kN/m})$ | $\phi(\text{degree})$ | $\gamma_s(\text{kN/m}^3)$ | $S_v$ (m) | Reinforcement Type                      | Measured Maximum Lateral Deformations (mm)                           | Reference                                                    |
|-------------|-------|------|---------------------|--------------------|-----------------------|---------------------------|-----------|-----------------------------------------|----------------------------------------------------------------------|--------------------------------------------------------------|
| 1           | 6.0   | 4.3  | 1.8                 | --                 | 40                    | 20.1                      | 0.6–1.0   | Biaxial geogrid                         | 19.56 (P = 0), 91.44 (P = 35 kPa)                                    | Bathurst et al., (1993)                                      |
| 2           | 4.5   | 8–12 | 0.3                 | 157.3              | 40                    | 22.1                      | 0.4       | Uniaxial geogrid                        | 7 (P = 115 kPa), 6 (P = 150 kPa)                                     | Abu-Hejleh, et al., (2002) (Section 200)                     |
| 3           | 5.9   | 8–12 | 0.3                 | 157.3              | 40                    | 22.1                      | 0.4       | Uniaxial geogrid                        | 9 (P = 115 kPa), 13 (P = 150 kPa)                                    | Abu-Hejleh, et al., (2002) (Section 400)                     |
| 4           | 5.9   | 8–12 | 0.3                 | 157.3              | 40                    | 22.1                      | 0.4       | Uniaxial geogrid                        | 10 (P = 115 kPa)                                                     | Abu-Hejleh, et al., (2002) (Section 800)                     |
| 5           | 3.6   | 2.5  | 1                   | 20.4               | 40                    | 16.7                      | 0.6       | Biaxial geogrid                         | 5.2 (P = 0), 9.3 (P = 30 kPa), 13.5 (P = 50 kPa), 31.4 (P = 70 kPa)  | Hatami. K. and Bathurst (2005) Wall No.1                     |
| 6           | 3.6   | 2.5  | 1                   | 10.2               | 40                    | 16.7                      | 0.6       | Biaxial geogrid                         | 7.9 (P = 0), 12.0 (P = 30 kPa), 35.0 (P = 50 kPa), 58.4 (P = 70 kPa) | Hatami. K. and Bathurst (2005) and Bathurst (2009) Wall No.2 |
| 7           | 3.6   | 2.5  | 1                   | 20.4               | 40                    | 16.7                      | 0.9       | Biaxial geogrid                         | 6.0 (P = 0)                                                          | Hatami. K. and Bathurst (2005) Wall No.3                     |
| 8           | 3.6   | 2.5  | 1                   | 7.3                | 40                    | 16.7                      | 0.6       | Geogrid (PET)                           | 10.5 (P = 30 kPa), 20.3 (P = 50 kPa), 29.6 (P = 70 kPa)              | Hatami. K. and Bathurst (2006) and Bathurst (2009) Wall No.5 |
| 9           | 2.0   | 1.0  | 1.2                 | 70.0               | 54                    | 15.9                      | 0.194     | Biaxial woven polypropylene geotextiles | 4.8(P = 200 kPa) 9.0(P = 400 kPa)                                    | Jennifer E. Nicks (2016) 8–70–8-B                            |

|    |      |       |     |      |      |       |       |                    |                                        |                                  |
|----|------|-------|-----|------|------|-------|-------|--------------------|----------------------------------------|----------------------------------|
| 10 | 0.54 | 0.378 | 0.8 | 12.4 | 36.1 | 17.52 | 0.135 | Biaxial<br>geogrid | 2.7(P = 100 kPa);<br>5.94(P = 200 kPa) | Xiao et al., (2013) D/H<br>= 0.3 |
|----|------|-------|-----|------|------|-------|-------|--------------------|----------------------------------------|----------------------------------|

<sup>1</sup> H = GRS wall height, L = reinforcement length,  $\varepsilon_d$  = maximum reinforcement strain,  $T_y$  = ultimate tensile strength of reinforcement,  $\varphi$  = friction angle of soil,  $\gamma_s$  = unit weight of soil,  $S_v$  = vertical spacing of reinforcement, P = surcharge load.

**Table S3.** Measured and predicted maximum lateral deformations of GRS walls.

| Case Number | Measured (mm) | Surcharge load (kPa) | Predicted(mm) |                |         |        |        |           |          |
|-------------|---------------|----------------------|---------------|----------------|---------|--------|--------|-----------|----------|
|             |               |                      | FHWA (F)      | GeoService (G) | CTI (C) | Wu (1) | Wu (2) | Adams (A) | Wang (W) |
| 1           | 19.56         | 0                    | 79            | 38.7           | 86.4    | --     | --     | --        | --       |
|             | 91.44         | 35                   | 118.8         |                |         |        |        |           |          |
| 2           | 7             | 115                  | --            | 18             | 9.2     | 19.5   | --     | 14.7      | --       |
|             | 6             | 150                  | --            |                |         |        |        |           |          |
| 3           | 9             | 115                  | --            | 18             | 12      | 19.5   |        | 28.5      | --       |
|             | 13            | 150                  | --            |                |         |        |        |           |          |
| 4           | 10            | 115                  | --            | 18             | 12      | 19.5   | --     | 28.5      | --       |
| 5           | 5.2           | 0                    | 48.8          | 12.5           | 24.5    | 10.4   | --     | 51.4      | 122.7    |
|             | 9.3           | 30                   | 69.2          |                |         |        | 1.5    |           |          |
|             | 13.5          | 50                   | 87.3          |                |         |        | 2.8    |           |          |
|             | 31.4          | 70                   | 110.2         |                |         |        | 4.1    |           |          |
|             |               |                      |               |                |         |        |        |           |          |
| 6           | 7.9           | 0                    | 48.8          | 12.5           | 24.5    | 10.4   | --     | 51.4      | 122.8    |
|             | 12.0          | 30                   | 69.2          |                |         |        | 2.9    |           |          |
|             | 35.0          | 50                   | 87.3          |                |         |        | 5.6    |           |          |
|             | 58.4          | 70                   | 110.2         |                |         |        | 8.3    |           |          |
|             |               |                      |               |                |         |        |        |           |          |
| 7           | 6.0           | 0                    | 48.8          | 12.5           | 24.5    | 10.4   | --     | 51.4      | 122.7    |
| 8           | 10.5          | 30                   | 69.2          | 12.5           | 24.5    | 11.6   | 4.6    | 51.4      | 122.9    |
|             | 20.3          | 50                   | 87.3          |                |         |        | 8.7    |           |          |
|             | 29.6          | 70                   | 110.2         |                |         |        | 12.8   |           |          |
| 9           | 4.8           | 200                  | 409.4         | 6              | 16.3    | --     | --     | --        | --       |
|             | 9.0           | 400                  | 4209.4        |                |         |        |        |           |          |
| 10          | 2.7           | 100                  | 23.33         | 1.5            | 2.9     | 5.8    | --     | --        | --       |
|             | 5.94          | 200                  | 74.6          |                |         |        |        |           |          |

Notes: Wu (1) = the equation can be used for walls with flexible facing because the rigidity of the wall is not considered; Wu (2) = the equation considers the rigidity of the wall facing.

**Table S4.** Introduction of the yield acceleration.

| Method of Calculation | Computing Formula                                                                                                                                                                                                                                                                                                    | Annotation                                                                                                                                                                                                                                            |
|-----------------------|----------------------------------------------------------------------------------------------------------------------------------------------------------------------------------------------------------------------------------------------------------------------------------------------------------------------|-------------------------------------------------------------------------------------------------------------------------------------------------------------------------------------------------------------------------------------------------------|
| C.C. Huang<br>[34]    | $k_c = 0.9797 \tan \varphi - 0.1629 \frac{B_w}{H} + 0.2012 \frac{L}{H} + 0.128\beta - 0.4176 \dots d = 0.3m$                                                                                                                                                                                                         | $k_c$ : threshold acceleration<br>$\varphi$ : internal friction angle of the backfill soil<br>$B_w$ : width of the wall<br>$H$ : height of the wall<br>$L$ : reinforcement length<br>$\beta$ : inclination of the wall<br>$d$ : reinforcement spacing |
|                       | $k_c = 0.896 \tan \varphi + 0.0741 \frac{B_w}{H} + 0.188 \frac{L}{H} + 0.1857\beta - 0.4302 \dots d = 0.6m$                                                                                                                                                                                                          |                                                                                                                                                                                                                                                       |
| E.Ausilio<br>[30]     | $k_y = K \frac{\sin \Omega \sin \beta}{\sin(\beta - \Omega)} - \tan(\Omega - \varphi)$<br>$\Omega = \tan^{-1} \left\{ \frac{\tan \beta [-K \tan \beta \tan \varphi - \tan 2\varphi - 1 + \sqrt{K(\tan^2 \varphi + 1)(1 + \tan \beta \tan \varphi)^2}]}{K \tan^2 \beta \tan^2 \varphi - \tan^2 \varphi - 1} \right\}$ | $k_y$ : threshold acceleration;<br>$\Omega$ : angle between the fracture surface and horizontal surface;                                                                                                                                              |

|           |                                                                                                                                                                                                     |                                                                                                                                                                                                                                                                                                                                                                                                                                                                                                                                                                                                                                                                                                                                                        |
|-----------|-----------------------------------------------------------------------------------------------------------------------------------------------------------------------------------------------------|--------------------------------------------------------------------------------------------------------------------------------------------------------------------------------------------------------------------------------------------------------------------------------------------------------------------------------------------------------------------------------------------------------------------------------------------------------------------------------------------------------------------------------------------------------------------------------------------------------------------------------------------------------------------------------------------------------------------------------------------------------|
|           |                                                                                                                                                                                                     | <p><math>D_j</math>: reinforcement spacing;<math>\gamma</math>: unit weight of soil;</p> <p><math>\phi</math>: internal friction angle of the backfill soil</p> <p>K: tension strength value of the reinforcement,</p> <p><math>K = \frac{t_j}{\gamma h_j D_j}</math>; <math>t_j</math>:reinforcement load;</p> <p><math>h_j</math>: distance between the J-layer reinforcement and wall top</p>                                                                                                                                                                                                                                                                                                                                                       |
| Muni [16] | $k_c = \frac{(1 - k_v) \tan \delta_u - 0.5 \frac{S_v}{L} \frac{\gamma_b}{\gamma_f} K_a}{(1 + \frac{3}{8} \frac{S_v}{L} \frac{\gamma_b}{\gamma_f})}$                                                 | <p><math>k_v</math>: vertical acceleration coefficient;</p> <p><math>\delta_u</math>: friction coefficient of the reinforced soil section;</p> <p><math>S_v</math>: vertical reinforcement spacing;</p> <p>L: reinforcement length;</p> <p><math>\gamma_f</math>: filling weight of the retaining wall panel;</p> <p><math>K_a</math>: coefficient of the active earth pressure</p>                                                                                                                                                                                                                                                                                                                                                                    |
| Cai [15]  | $F_{dyn} = \frac{2(a_u + W_w(1 + k_v) \tan \lambda_u)}{[0.8\Delta K_{dyn} \cos(\delta - \psi) + (K_a - 0.6\Delta K_{dyn}) \cos(\delta - \psi)(\frac{z}{H} - \frac{S_v}{4H}) + k_h \frac{L_w}{H}]};$ | <p><math>F_{dyn}</math>: dynamic safety factor; H: Height of the retaining wall;</p> <p><math>k_v</math>: vertical acceleration coefficient;</p> <p><math>k_h</math>: horizontal acceleration coefficient;</p> <p><math>S_v</math>: module area;</p> <p><math>\Delta K_{dyn}</math>: dynamic soil pressure increment;</p> <p><math>\alpha_u</math>: minimum shear strength of the interface</p> <p><math>\delta</math>: interface friction angle</p> <p><math>\psi</math>: angle between the wall back and vertical direction;</p> <p><math>W_w</math>: panel weight;</p> <p><math>\lambda_u</math>: friction coefficient between the modules;</p> <p><math>K_a</math>: static earth pressure coefficient of the calculated Coulomb earth pressure</p> |

**Table S5.** Calculation method of the horizontal displacement for the retaining wall under earthquake action.

| Methods                                          | Fundamental Formula                                                                                            | Annotation                                        | Hypothesis                                                    |
|--------------------------------------------------|----------------------------------------------------------------------------------------------------------------|---------------------------------------------------|---------------------------------------------------------------|
| Richard sand Elms upper bound method [31]        | $d = 0.087 \frac{v_m^2}{k_m g} \left( \frac{k_c}{k_m} \right)^{-4}$                                            | $v_m$ : horizontal peak velocity;                 |                                                               |
| Whitman and Liao average licit [32]              | $d = 37 \frac{v_m^2}{k_m g} \exp \left( -9.4 \frac{k_c}{k_m} \right)$                                          | $k_m$ : horizontal peak acceleration coefficient; | The landslide is rigid plastic.                               |
| Cai and Bathrust average upper bound method [15] | $d = 35 \frac{v_m^2}{k_m g} \exp \left( -6.91 \frac{k_c}{k_m} \right) \left( \frac{k_c}{k_m} \right)^{-0.38}$  | $k_c$ : horizontal yield acceleration coefficient | The peak acceleration and peak velocity are reference factors |
| Newmark upper bound method [33]                  | $d = 9.2 \frac{v_m^2}{k_m g} \exp \left( -5.87 \frac{k_c}{k_m} \right) \left( \frac{k_c}{k_m} \right)^{-0.49}$ |                                                   |                                                               |
